# Supplementary material for: Screening and Mechanism of Novel Angiotensin-I-Converting Enzyme Inhibitory Peptides in X. sorbifolia Seed Meal: A Computer-Assisted Experimental Study Method
Source: MDPI journal article supplement (doi:10.3390/molecules27248792), 2022-12-12
Supplement: s1 [file s1]

# Supplementary materials

## Supplemental Table S1

Table1 S1 Analysis of L9 (3)<sup>4</sup> test results

| Test No.                | Factors        |                |                |                | Hydrolysis degree (%) | ACE inhibition rate (%) |
|-------------------------|----------------|----------------|----------------|----------------|-----------------------|-------------------------|
|                         | A              | B              | C              | D              |                       |                         |
|                         | Hydrolysis     | Hydrolysis     | Amount of      | Hydrolysis     |                       |                         |
|                         | time           | temperature    | enzyme added   | pH             |                       |                         |
| 1                       | 1              | 1              | 1              | 1              | 8.33                  | 87.74                   |
| 2                       | 1              | 2              | 2              | 2              | 11.62                 | 96.78                   |
| 3                       | 1              | 3              | 3              | 3              | 6.53                  | 99.28                   |
| 4                       | 2              | 1              | 2              | 3              | 8.21                  | 98.33                   |
| 5                       | 2              | 2              | 3              | 1              | 12.52                 | 97.65                   |
| 6                       | 2              | 3              | 1              | 2              | 9.17                  | 96.65                   |
| 7                       | 3              | 1              | 3              | 2              | 10.02                 | 98.32                   |
| 8                       | 3              | 2              | 1              | 3              | 10.33                 | 98.31                   |
| 9                       | 3              | 3              | 2              | 1              | 11.67                 | 90.04                   |
| Hydrolysis degree (%)   |                |                |                |                |                       |                         |
| K <sub>1</sub>          | 26.48          | 26.56          | 27.83          | 32.52          |                       |                         |
| K <sub>2</sub>          | 29.90          | 34.47          | 31.50          | 30.81          |                       |                         |
| K <sub>3</sub>          | 32.02          | 27.37          | 29.07          | 25.07          |                       |                         |
| k <sub>1</sub>          | 8.83           | 8.85           | 9.28           | 10.84          |                       |                         |
| k <sub>2</sub>          | 9.97           | 11.49          | 10.50          | 10.27          |                       |                         |
| k <sub>3</sub>          | 10.67          | 9.12           | 9.69           | 8.36           |                       |                         |
| R                       | 1.14           | 2.64           | 1.22           | 2.48           |                       |                         |
| Optimal value           | A <sub>2</sub> | B <sub>2</sub> | C <sub>3</sub> | D <sub>1</sub> |                       |                         |
| ACE inhibition rate (%) |                |                |                |                |                       |                         |
| K <sub>1</sub>          | 283.8          | 284.39         | 282.7          | 275.43         |                       |                         |
| K <sub>2</sub>          | 292.63         | 292.74         | 285.15         | 291.75         |                       |                         |
| K <sub>3</sub>          | 286.67         | 285.97         | 295.25         | 295.92         |                       |                         |
| k <sub>1</sub>          | 94.60          | 94.80          | 94.23          | 91.81          |                       |                         |
| k <sub>2</sub>          | 97.54          | 97.58          | 95.05          | 97.25          |                       |                         |
| k <sub>3</sub>          | 95.56          | 95.32          | 98.42          | 98.64          |                       |                         |
| R                       | 2.94           | 2.78           | 4.18           | 6.83           |                       |                         |

|         |                |                |                |                |
|---------|----------------|----------------|----------------|----------------|
| Optimal |                |                |                |                |
| value   | A <sub>1</sub> | B <sub>3</sub> | C <sub>3</sub> | D <sub>3</sub> |

## Supplemental Figure

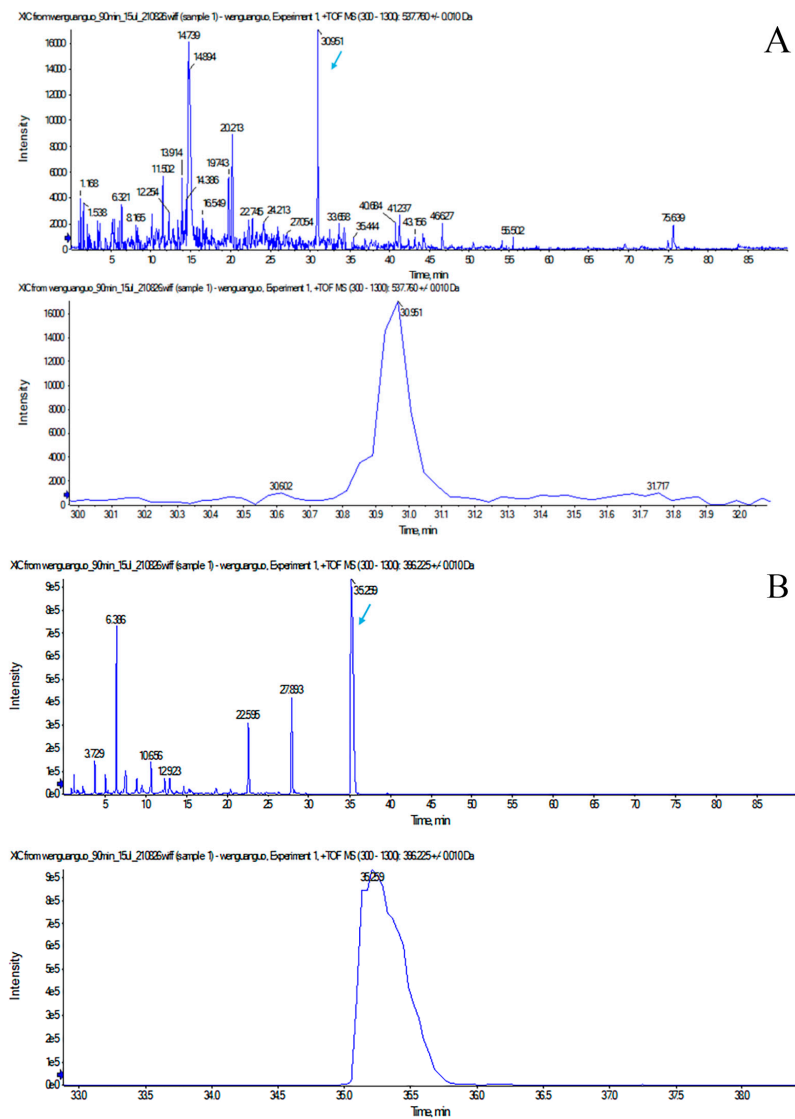

XC from vergunguo\_90min\_15J\_210226.wiff (sample 1) - vergunguo, Experiment 1, +TOF MS (300-1300), 368.200 +/- 0.010 Da

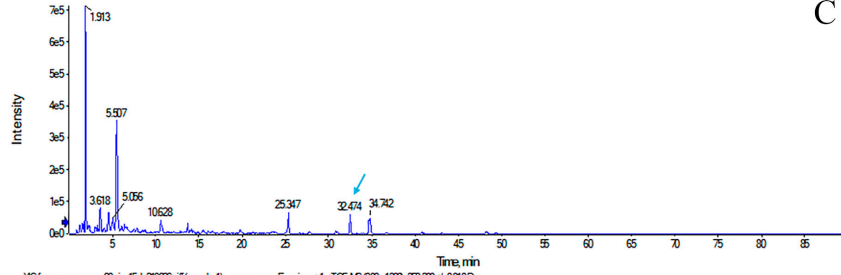

C

XC from vergunguo\_90min\_15J\_210226.wiff (sample 1) - vergunguo, Experiment 1, +TOF MS (300-1300), 368.200 +/- 0.010 Da

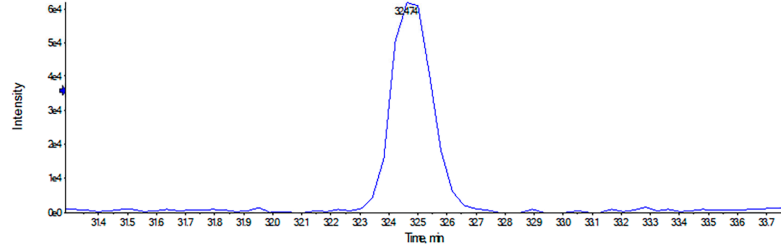

XC from vergunguo\_90min\_15J\_210226.wiff (sample 1) - vergunguo, Experiment 1, +TOF MS (300-1300), 415.700 +/- 0.010 Da

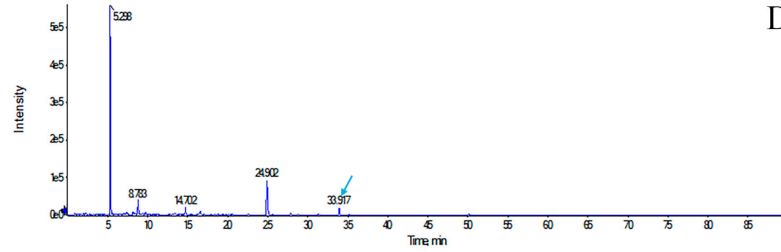

D

XC from vergunguo\_90min\_15J\_210226.wiff (sample 1) - vergunguo, Experiment 1, +TOF MS (300-1300), 415.700 +/- 0.010 Da

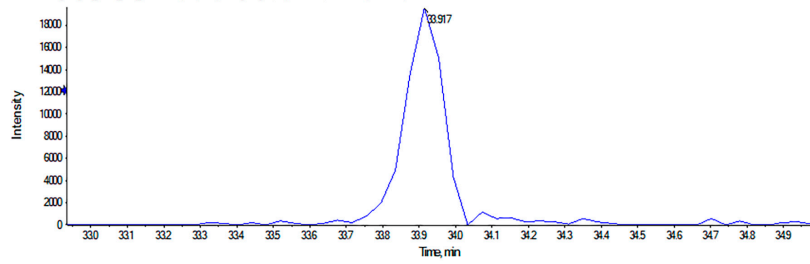

XC from vergunguo\_90min\_15J\_210226.wiff (sample 1) - vergunguo, Experiment 1, +TOF MS (300-1300), 551.730 +/- 0.010 Da

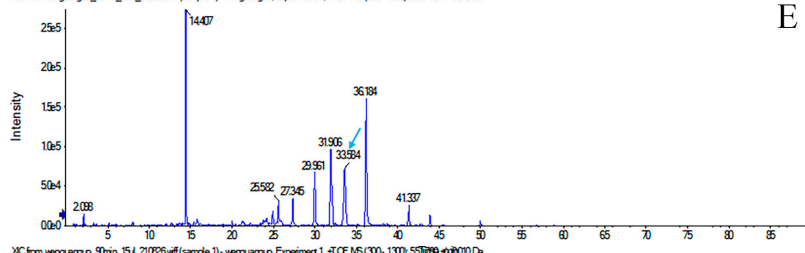

E

XC from vergunguo\_90min\_15J\_210226.wiff (sample 1) - vergunguo, Experiment 1, +TOF MS (300-1300), 551.730 +/- 0.010 Da

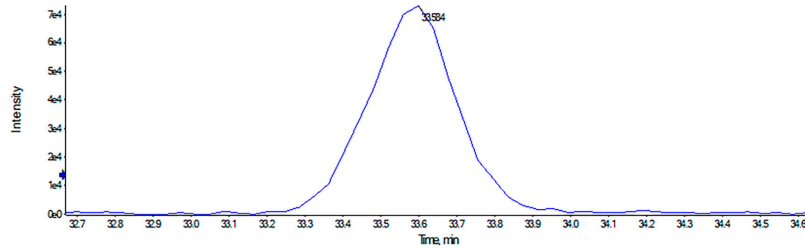

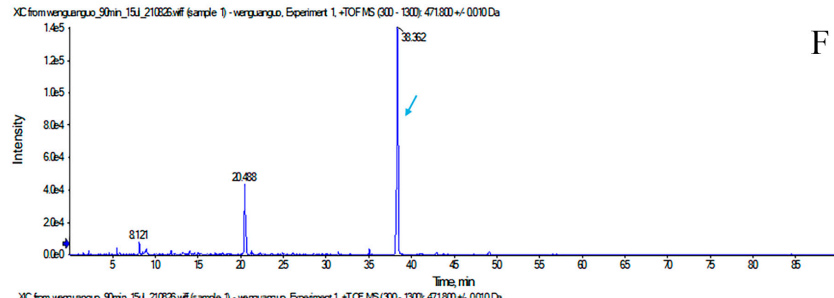

F

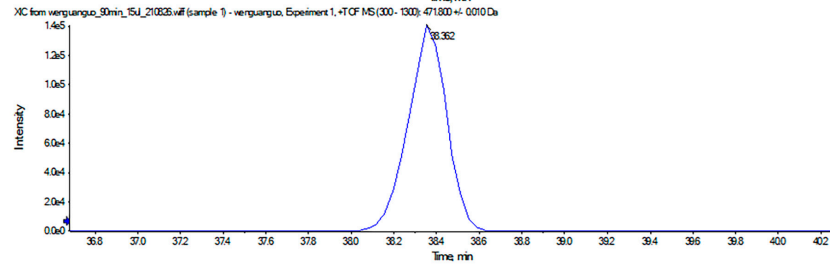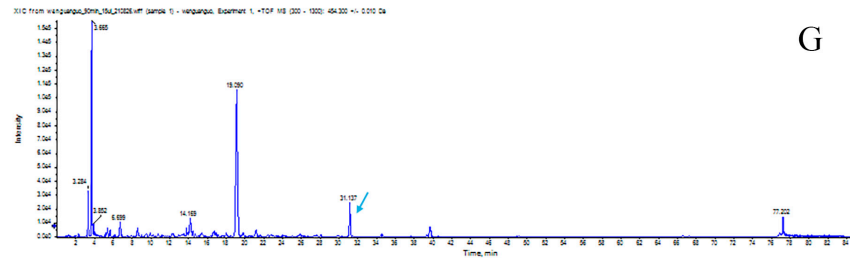

G

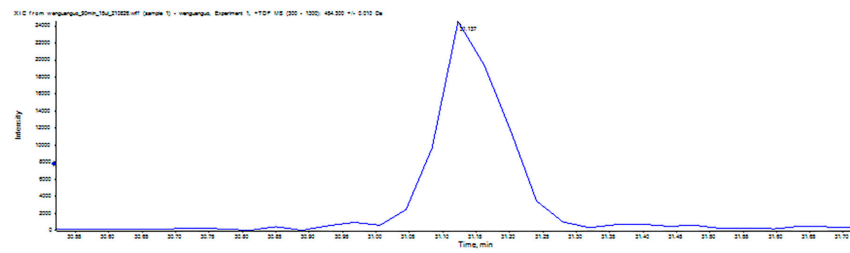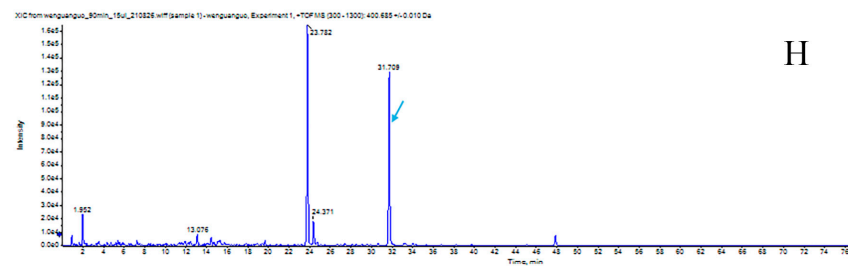

H

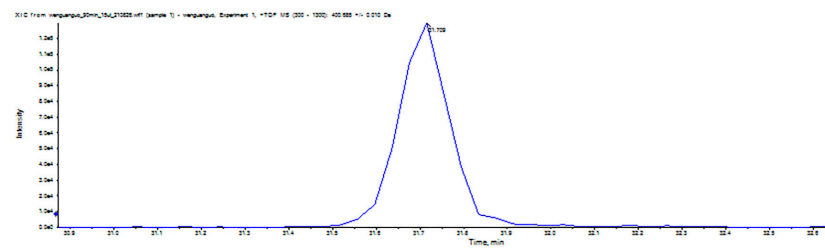

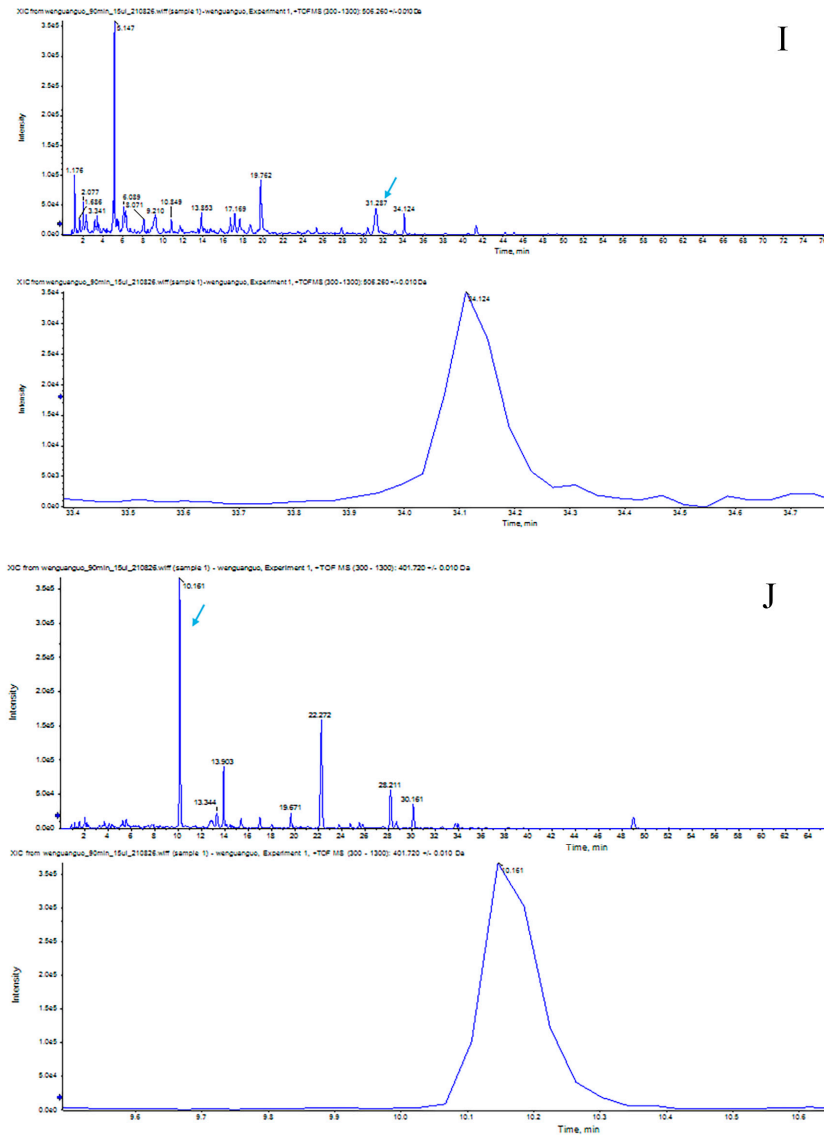

Figure S1. The ion flow diagram of polypeptide extraction from XSM. A. AEQPPLFDGT . B. GMVRELIVNVG. C. LCLELVNGVI. D. GGLPGFDPA. E. VTYPIIADPN. F. IMAVLAIVL. G. INPILLPK. H.ETYFIVR. I. TVWPGIQPN. J. IAICNGVL.
